# Supplementary material for: Sex impacts treatment decisions in multiple sclerosis
Source: PubMed Central journal article supplement (PMC11136719; doi:10.1007/s00415-024-12270-y), 2024-03-05
Supplement: 415_2024_12270_MOESM1_ESM.pdf [file 415_2024_12270_MOESM1_ESM.pdf]

## Supplemental

### Sex impacts Treatment Decisions in Multiple Sclerosis

Harald Hegen, Klaus Berek, Florian Deisenhammer, Thomas Berger, Christian Enzinger, Michael Guger, Jörg Kraus, Janette Walde, Franziska Di Pauli

- Figure e-1** Time to start of DMT in female and male pwMS depending on different disease activity measures. **Page 2**
- Table e-1:** Demographics and clinical characteristics in pwMS depending on sex (*total cohort*). **Page 3**
- Table e-2:** Logistic regression analysis identifying predictors of highly effective DMT. **Page 4**
- Table e-3:** Gamma regression analysis identifying predictors of time to DMT. **Page 5**
- Table e-4:** Demographics and clinical characteristics in pwMS depending on treatment escalation (*Question 1*). **Page 6**
- Table e-5:** Demographics and clinical characteristics depending on sex in pwMS escalating or continuing DMT (*Question 1*). **Page 7**
- Table e-6:** Demographics and clinical characteristics in pwMS discontinuing moderate-efficacy DMT (*Question 2*). **Page 8**
- Table e-7:** Demographics and clinical characteristics depending on sex in pwMS stopping or continuing moderate-efficacy DMT (*Question 2*). **Page 9**
- Table e-8:** Reasons for discontinuation of moderate-efficacy DMT depending on sex (*Question 2*). **Page 10**
- Table e-9:** Demographics and clinical characteristics in pwMS depending in treatment de-escalation (*Question 3*). **Page 11**
- Table e-10:** Demographics and clinical characteristics depending on sex in pwMS de-escalating or continuing DMT (*Question 3*). **Page 12**
- Table e-11:** Demographics and clinical characteristics in pwMS discontinuing high-efficacy DMT (*Question 4*). **Page 13**
- Table e-12:** Demographics and clinical characteristics depending on sex in pwMS stopping or continuing high-efficacy DMT (*Question 4*). **Page 14**
- Table e-13:** Reasons for discontinuation of high-efficacy DMT depending on sex (*Question 4*). **Page 15**
- Table e-14:** Cox regression analysis in a subgroup of pwMS excluding females with family planning for identifying predictors of early moderate-efficacy DMT discontinuation. **Page 16**
- Table e-15:** Cox regression analysis in the subgroup of pwMS excluding females with family planning for identifying predictors of early high-efficacy DMT discontinuation. **Page 17**
- Table e-16:** Sensitivity analysis in pwMS escalating or continuing DMT (*Question 1*) according to start of DMT. **Page 18**
- Table e-17:** Sensitivity analysis in pwMS discontinuing moderate-efficacy DMT (*Question 2*) according to start of DMT. **Page 19**
- Table e-18:** Sensitivity analysis in pwMS de-escalating or continuing high-efficacy DMT (*Question 3*) according to start of DMT. **Page 20**
- Table e-19:** Sensitivity analysis in pwMS discontinuing high-efficacy DMT (*Question 4*) according to start of DMT. **Page 21**
- Table e-20:** A posteriori power analyses for the multivariable Cox regression identifying predictors of DMT escalation (*Question 1*). **Page 22**
- Table e-21:** A posteriori power analyses for the multivariable Cox regression identifying predictors of moderate-efficacy DMT discontinuation (*Question 2*). **Page 23**
- Table e-22:** A posteriori power analyses for the multivariable Cox regression identifying predictors of DMT de-escalation (*Question 3*). **Page 24**
- Table e-23:** A posteriori power analyses for the multivariable Cox regression identifying predictors of high-efficacy DMT discontinuation (*Question 4*). **Page 25**

**Figure e-1** Time to start of DMT in female and male pwMS depending on different disease activity measures.

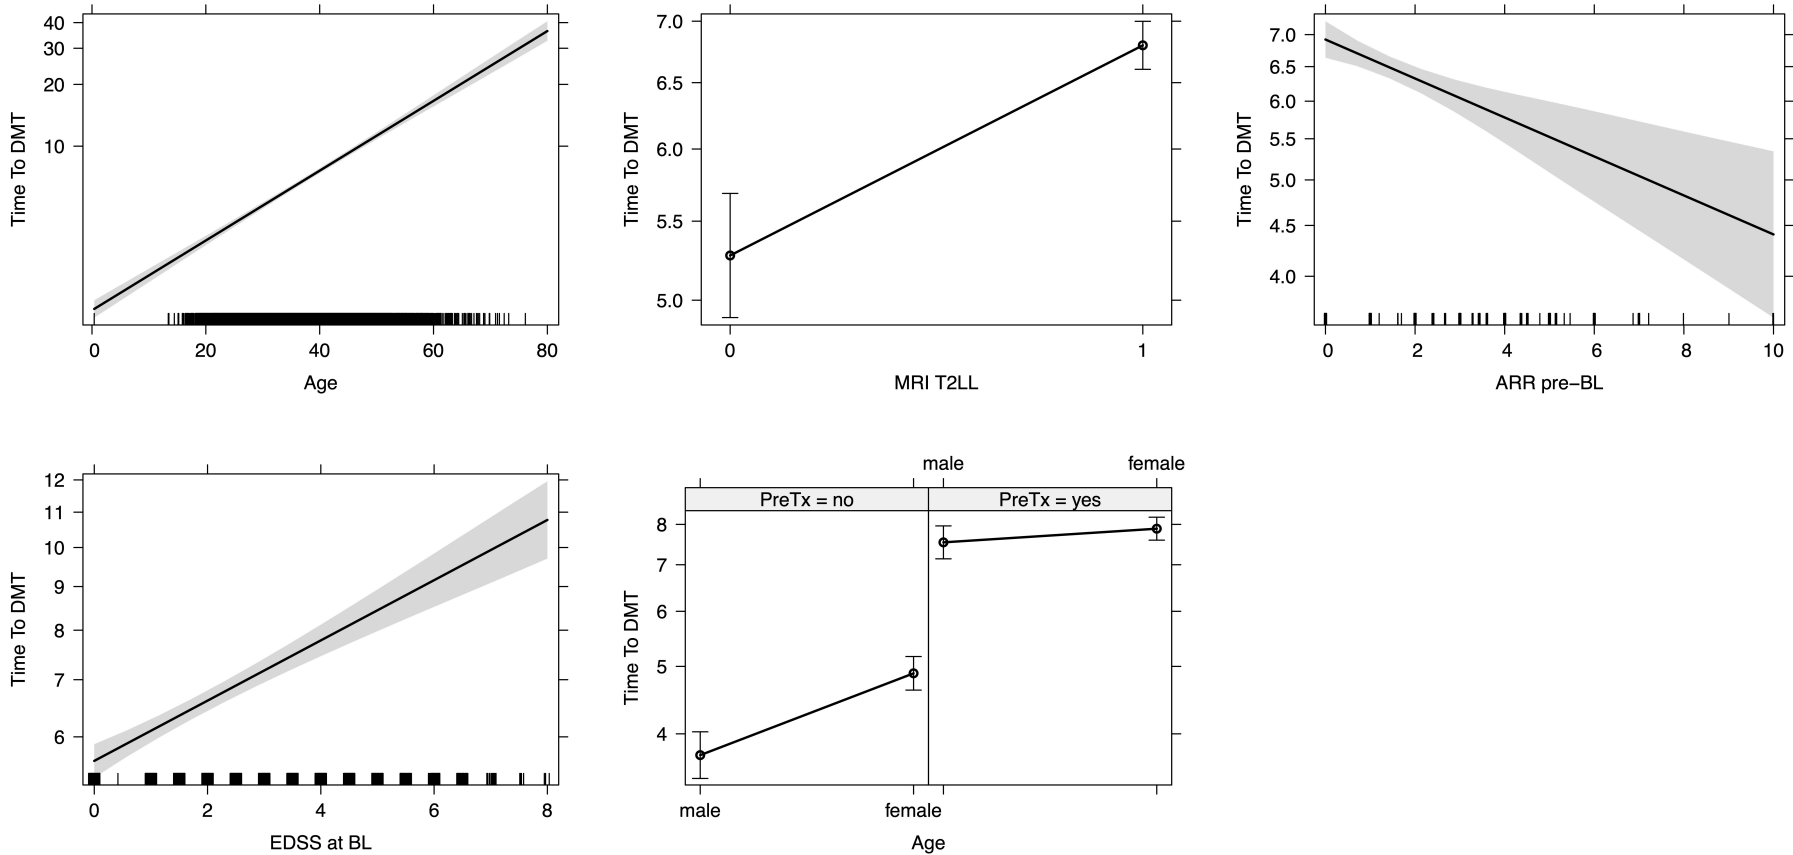

Legend:

Pre-treatment included interferon-beta and/ or glatiramer acetate.

*Abbreviations:* ARR, annualized relapse rate; BL, baseline; DMT, disease-modifying treatment; moderate-efficacy DMT, mDMT; MRI, magnetic resonance imaging; preTX, pre-treatment; T2LL, T2 lesions load

**Table e-1:** Demographics and clinical characteristics in pwMS depending on sex (*total cohort*)

|                                                         | <b>All</b>         | <b>Female</b>      | <b>Male</b>        |
|---------------------------------------------------------|--------------------|--------------------|--------------------|
| <b>Number</b>                                           | 4224               | 2905               | 1319               |
| <b>Age (years)</b>                                      | 36.5 (28.9 – 45.0) | 36.3 (28.7 – 44.7) | 37.1 (29.5 – 45.4) |
| <b>Disease duration (years)</b>                         | 5.9 (2.2 – 11.7)   | 6.0 (2.3 – 11.9)   | 5.6 (1.9 – 10.9)   |
| <b>Year of disease onset</b>                            | 2008 (2002-2013)   | 2007 (2001-2013)   | 2008 (2003-2013)   |
| <b>Pre-ARR<sup>†,  </sup></b>                           | 1 (1 – 2)          | 1 (1 – 2)          | 1 (1 – 2)          |
| <b>EDSS<sup>§</sup></b>                                 | 2 (1 – 3)          | 2 (1 – 3)          | 2 (1 – 3.5)        |
| <b>MRI T2LL<sup>§</sup> (&gt;9), n (%)<sup>  </sup></b> | 3738 (88.5)        | 2567 (88.4)        | 1171 (88.8)        |
| <b>Pre-treatment<sup>  </sup>, n (%)</b>                | 2989 (70.8)        | 2088 (71.9)        | 901 (68.3)         |
| <b>DMT, n (%)</b>                                       |                    |                    |                    |
| Dimethyl fumarate                                       | 1045 (24.7)        | 716 (24.6)         | 329 (24.9)         |
| Teriflunomide                                           | 387 (9.2)          | 246 (8.5)          | 141 (10.7)         |
| Fingolimod                                              | 1145 (27.1)        | 792 (27.3)         | 353 (26.8)         |
| Natalizumab                                             | 1490 (35.3)        | 1058 (36.4)        | 432 (32.8)         |
| Ocrelizumab                                             | 87 (2.1)           | 44 (1.5)           | 43 (3.3)           |
| Cladribine                                              | 38 (0.9)           | 29 (1.0)           | 9 (0.7)            |
| Alemtuzumab                                             | 32 (0.8)           | 20 (0.7)           | 12 (0.9)           |

Legend:

Data are shown as median (IQR) unless otherwise specified. Disease duration was the time between symptom onset and inclusion into registry, i.e. DMT start (baseline).

<sup>§</sup> These variables were assessed at baseline. <sup>†</sup> ARR was determined in the 12 months prior to baseline. <sup>||</sup> Pre-treatment included interferon-beta and/ or glatiramer acetate.

<sup>||</sup> Missing values: Pre-ARR, n=3; MRT T2LL, n=33.

*Abbreviations:* ARR, annualized relapse rate; DMT, disease-modifying treatment, MRI, magnetic resonance imaging; pwMS, people with multiple sclerosis; T2LL, T2 lesions load

**Table e-2:** Logistic regression analysis identifying predictors of highly effective DMT.

|                                                    | <b>Coefficient</b> | <b>SE</b> | <b>P value</b>   | <b>95% CI</b> |        | <b>OR</b> |
|----------------------------------------------------|--------------------|-----------|------------------|---------------|--------|-----------|
| <b>Constant</b>                                    | -1.890             | 0.212     | <b>&lt;0.001</b> | -2.309        | -1.476 | 0.151     |
| <b>Sex</b> (female, ref: male)                     | -0.002             | 0.086     | 0.979            | -0.172        | 0.166  | 0.998     |
| <b>Age</b> [years]                                 | -0.043             | 0.005     | <b>&lt;0.001</b> | -0.051        | -0.034 | 0.958     |
| <b>Disease duration</b><br>[years]                 | 0.006              | 0.007     | 0.381            | -0.007        | 0.019  | 1.006     |
| <b>Pre-ARR<sup>†</sup></b>                         | 1.000              | 0.053     | <b>&lt;0.001</b> | 0.898         | 1.106  | 2.719     |
| <b>EDSS<sup>§</sup></b>                            | 0.511              | 0.033     | <b>&lt;0.001</b> | 0.447         | 0.576  | 1.666     |
| <b>MRI T2LL<sup>§</sup></b> (>9, ref: ≤9)          | 0.740              | 0.125     | <b>&lt;0.001</b> | 0.496         | 0.985  | 2.095     |
| <b>Pre-treatment<sup>¶</sup></b> (yes,<br>ref: no) | 1.571              | 0.088     | <b>&lt;0.001</b> | 1.400         | 1.744  | 4.813     |

Cox Snell: 0.427

Legend:

<sup>§</sup> These variables were assessed at baseline. <sup>†</sup> ARR was determined in the 12 months prior to baseline. <sup>¶</sup> Pre-treatment included interferon-beta and/ or glatiramer acetate.

[ ] shows units and ( ) indicates reference categories.

Bold p-values hold with Bonferroni-Holm correction.

*Abbreviations:* ARR, annualized relapse rate; CI, confidence interval; DMT, disease-modifying treatment; EDSS, Expanded Disability Status Scale; MRI, magnetic resonance imaging; OR, Odds ratio; ref, reference; SE, standard error; T2LL, T2 lesions load

**Table e-3:** Gamma regression analysis identifying predictors of time to DMT.

|                                                 | <b>Estimate</b> | <b>SE</b> | <b>P value</b>   | <b>95% CI</b> |        | <b>Exp(Estimate)</b> |
|-------------------------------------------------|-----------------|-----------|------------------|---------------|--------|----------------------|
| <b>Constant</b>                                 | -0.456          | 0.069     | <b>&lt;0.001</b> | -0.596        | -0.316 | 0.634                |
| <b>Sex (female, ref: male)</b>                  | 0.271           | 0.048     | <b>&lt;0.001</b> | 0.176         | 0.365  | 1.311                |
| <b>Age [years]</b>                              | 0.039           | 0.001     | <b>&lt;0.001</b> | 0.037         | 0.042  | 1.040                |
| <b>Pre-ARR<sup>†</sup></b>                      | -0.045          | 0.011     | <b>&lt;0.001</b> | -0.067        | -0.023 | 0.956                |
| <b>EDSS<sup>§</sup></b>                         | 0.081           | 0.009     | <b>&lt;0.001</b> | 0.064         | 0.098  | 1.085                |
| <b>MRI T2LL<sup>§</sup> (&gt;9, ref: ≤9)</b>    | 0.253           | 0.040     | <b>&lt;0.001</b> | 0.174         | 0.332  | 1.288                |
| <b>Pre-treatment<sup>¶</sup> (yes, ref: no)</b> | 0.704           | 0.048     | <b>&lt;0.001</b> | 0.610         | 0.797  | 2.022                |
| <b>Sex : Pre-treatment</b>                      | -0.225          | 0.058     | <b>&lt;0.001</b> | -0.339        | -0.112 | 0.798                |

Cox Snell: 0.312

Legend:

<sup>§</sup> These variables were assessed at baseline. <sup>†</sup> ARR was determined in the 12 months prior to baseline. <sup>¶</sup> Pre-treatment included interferon-beta and/ or glatiramer acetate.

[ ] shows units and ( ) indicates reference categories.

Bold p-values hold with Bonferroni-Holm correction.

*Abbreviations:* ARR, annualized relapse rate; CI, confidence interval; DMT, disease-modifying treatment; EDSS, Expanded Disability Status Scale; MRI, magnetic resonance imaging; ref, reference; SE, standard error; T2LL, T2 lesions load

Note: Exp(estimate) gives the factor change in the expected value of y when x changes by 1 unit

**Table e-4:** Demographics and clinical characteristics in pwMS depending on treatment escalation (*Question 1*).

| <b>DMT escalation</b>                                                            |                    |                    |                      |
|----------------------------------------------------------------------------------|--------------------|--------------------|----------------------|
|                                                                                  | <b>All</b>         | <b>Escalation</b>  | <b>No Escalation</b> |
| <b>Number</b>                                                                    | 1211               | 149                | 1062                 |
| <b>Sex (female), n (%)</b>                                                       | 799 (66.0)         | 96 (64.4)          | 703 (66.2)           |
| <b>Age (years)</b>                                                               | 37.6 (29.9 – 46.1) | 35.6 (27.7 – 42.8) | 38.2 (30.1 – 46.6)   |
| <b>Disease duration (years)</b>                                                  | 4.1 (1.1 – 10.5)   | 3.4 (1.0 – 9.8)    | 4.3 (1.1 – 10.6)     |
| <b>Year of disease onset</b>                                                     | 2013 (2006-2016)   | 2013 (2006-2015)   | 2013 (2006-2017)     |
| <b>Pre-ARR<sup>†</sup></b>                                                       | 1 (0 – 1)          | 1 (1 – 2)          | 1 (0 – 1)            |
| <b>EDSS<sup>§</sup></b>                                                          | 1.5 (1 – 2)        | 1.5 (1 – 2)        | 1.5 (1 – 2)          |
| <b>MRI T2LL<sup>§</sup> (&gt;9), n (%)</b>                                       | 998 (82.4)         | 125 (83.9)         | 873 (82.2)           |
| <b>Pre-treatment<sup>¶</sup>, n (%)</b>                                          | 577 (47.6)         | 75 (50.3)          | 502 (47.3)           |
| <b>DMT, n (%)</b>                                                                |                    |                    |                      |
| Dimethyl fumarate                                                                | 881 (72.7)         | 99 (66.4)          | 782 (73.6)           |
| Teriflunomide                                                                    | 330 (27.3)         | 50 (33.6)          | 280 (26.4)           |
| <b>Time to DMT escalation (or observation period in pwMS without escalation)</b> | 1.99 (0.96 – 3.41) | 1.39 (0.71 – 2.45) | 2.10 (1.01 – 3.60)   |
| <b>ARR on DMT<sup>‡</sup></b>                                                    | 0.21 (0.51)        | 0.76 (0.90)        | 0.13 (0.38)          |
| <b>EDSS Progression, n (%)</b>                                                   | 225 (18.6)         | 61 (40.9)          | 164 (15.4)           |

Legend:

Data are shown as median (IQR) unless otherwise specified. Disease duration was the time between symptom onset and inclusion into registry, i.e. DMT start (baseline). ARR was calculated as the number of relapses divided by the observation period in years.

<sup>§</sup> These variables were assessed at baseline. <sup>†</sup> ARR was determined in the 12 months prior to baseline. <sup>¶</sup> Pre-treatment included interferon-beta and/ or glatiramer acetate., <sup>‡</sup> Mean (SD) is shown.

*Abbreviations:* ARR, annualized relapse rate; DMT, disease-modifying treatment; EDSS, Expanded Disability Status Scale; MRI, magnetic resonance imaging; pwMS, people with multiple sclerosis; T2LL, T2 lesions load

**Table e-5:** Demographics and clinical characteristics depending on sex in pwMS escalating or continuing DMT (*Question 1*).

|                                                                                  | <b>All</b>         | <b>Female</b>      | <b>Male</b>        |
|----------------------------------------------------------------------------------|--------------------|--------------------|--------------------|
| <b>Number</b>                                                                    | 1211               | 799                | 412                |
| <b>Age (years)</b>                                                               | 37.6 (29.9 – 46.1) | 37.9 (30.2 – 46.0) | 37.2 (29.6 – 46.3) |
| <b>Disease duration (years)</b>                                                  | 4.1 (1.1 – 10.5)   | 4.6 (1.2 – 11.3)   | 3.4 (1.0 – 9.1)    |
| <b>Year of disease onset</b>                                                     | 2013 (2006-2016)   | 2012 (2006-2016)   | 2013 (2008-2017)   |
| <b>Pre-ARR<sup>†</sup></b>                                                       | 1 (0 – 1)          | 1 (0 – 1)          | 1 (1 – 1)          |
| <b>EDSS<sup>§</sup></b>                                                          | 1.5 (1 – 2)        | 1.5 (1 – 2)        | 1.5 (1 – 2)        |
| <b>MRI T2LL<sup>§</sup> (&gt;9), n (%)</b>                                       | 998 (82.4)         | 656 (82.1)         | 342 (83.0)         |
| <b>Pre-treatment<sup>¶</sup>, n (%)</b>                                          | 577 (47.6)         | 393 (49.2)         | 184 (44.7)         |
| <b>DMT, n (%)</b>                                                                |                    |                    |                    |
| Dimethyl fumarate                                                                | 881 (72.7)         | 591 (73.9)         | 290 (70.4)         |
| Teriflunomide                                                                    | 330 (27.3)         | 208 (26.0)         | 122 (29.6)         |
| <b>Time to DMT escalation (or observation period in pwMS without escalation)</b> | 1.99 (0.96 – 3.41) | 1.94 (0.96-3.41)   | 2.12 (0.98-3.41)   |
| <b>ARR on DMT<sup>‡</sup></b>                                                    | 0.21 (0.51)        | 0.21 (0.52)        | 0.22 (0.50)        |
| <b>EDSS Progression, n (%)</b>                                                   | 225 (18.6)         | 150 (18.8)         | 75 (18.2)          |

Legend:

Data are shown as median (IQR) unless otherwise specified. Disease duration was the time between symptom onset and inclusion into registry, i.e. DMT start (baseline).

<sup>§</sup> These variables were assessed at baseline. <sup>†</sup> ARR was determined in the 12 months prior to baseline. <sup>¶</sup> Pre-treatment included interferon-beta and/ or glatiramer acetate.

<sup>‡</sup> Mean (SD) is shown.

*Abbreviations:* ARR, annualized relapse rate; DMT, disease-modifying treatment, EDSS, Expanded Disability Status Scale, MRI, magnetic resonance imaging; pwMS, people with multiple sclerosis; T2LL, T2 lesions load

**Table e-6:** Demographics and clinical characteristics in pwMS discontinuing moderate-efficacy DMT (*Question 2*).

| <b>mDMT discontinuation</b>                                                                |                    |                        |                           |
|--------------------------------------------------------------------------------------------|--------------------|------------------------|---------------------------|
|                                                                                            | <b>All</b>         | <b>Discontinuation</b> | <b>No Discontinuation</b> |
| <b>Number</b>                                                                              | 862                | 73                     | 789                       |
| <b>Sex</b> (female), n (%)                                                                 | 578 (67.1)         | 59 (80.8)              | 519 (65.8)                |
| <b>Age</b> (years)                                                                         | 38.6 (30.4 – 46.8) | 35.9 (26.7 – 49.3)     | 38.8 (31.0 – 46.5)        |
| <b>Disease duration</b> (years)                                                            | 4.8 (1.3 – 10.9)   | 5.2 (1.7 – 9.6)        | 4.8 (1.3 – 10.9)          |
| <b>Year of disease onset</b>                                                               | 2012 (2006-2015)   | 2011 (2007-2014)       | 2012 (2006-2015)          |
| <b>Pre-ARR<sup>†</sup></b>                                                                 | 1 (0 – 1)          | 1 (0 – 1)              | 1 (0 – 1)                 |
| <b>EDSS<sup>§</sup></b>                                                                    | 1.5 (1.0 – 2.0)    | 2.0 (1.0 – 2.5)        | 1.5 (1.0 – 2.0)           |
| <b>MRI T2LL<sup>§</sup> (&gt;9), n (%)</b>                                                 | 719 (83.4)         | 61 (83.6)              | 658 (83.4)                |
| <b>Pre-treatment<sup>¶</sup>, n (%)</b>                                                    | 434 (50.3)         | 43 (58.9)              | 391 (49.6)                |
| <b>DMT, n (%)</b>                                                                          |                    |                        |                           |
| Dimethyl fumarate                                                                          | 640 (74.2)         | 58 (79.5)              | 582 (73.8)                |
| Teriflunomide                                                                              | 222 (25.8)         | 15 (20.5)              | 207 (26.2)                |
| <b>Time to DMT discontinuation (or observation period in pwMS without discontinuation)</b> | 2.7 (1.8 – 4.0)    | 2.4 (1.9 – 3.4)        | 2.7 (1.8 – 4.1)           |
| <b>ARR on DMT<sup>‡</sup></b>                                                              | 0.11 (0.26)        | 0.06 (0.19)            | 0.12 (0.27)               |
| <b>EDSS progression, n (%)</b>                                                             | 65 (7.5)           | 12 (16.4)              | 53 (6.7)                  |

Legend:

Data are shown as median (IQR) unless otherwise specified. Disease duration was the time between symptom onset and inclusion into registry, i.e. DMT start (baseline). ARR was calculated as the number of relapses divided by the observation period in years.

<sup>§</sup> These variables were assessed at baseline. <sup>†</sup> ARR was determined in the 12 months prior to baseline. <sup>¶</sup> Pre-treatment included interferon-beta and/ or glatiramer acetate., <sup>‡</sup> Mean (SD) is shown.

*Abbreviations:* ARR, annualized relapse rate; DMT, disease-modifying treatment; EDSS, Expanded Disability Status Scale; mDMT, moderate-efficacy DMT; MRI, magnetic resonance imaging; pwMS, people with multiple sclerosis; T2LL, T2 lesions load



**Table e-7:** Demographics and clinical characteristics depending on sex in pwMS stopping or continuing moderate-efficacy DMT (*Question 2*).

|                                                                                            | <b>All</b>         | <b>Female</b>      | <b>Male</b>        |
|--------------------------------------------------------------------------------------------|--------------------|--------------------|--------------------|
| <b>Number</b>                                                                              | 862                | 578                | 284                |
| <b>Age (years)</b>                                                                         | 38.6 (30.4 – 46.8) | 38.5 (30.2 – 46.2) | 38.8 (30.9 – 47.9) |
| <b>Disease duration (years)</b>                                                            | 4.8 (1.3 – 10.9)   | 5.3 (1.5 – 11.3)   | 4.0 (1.1 – 9.8)    |
| <b>Year of disease onset</b>                                                               | 2012 (2006-2015)   | 2011 (2005-2015)   | 2012 (2007-2016)   |
| <b>Pre-ARR<sup>†</sup></b>                                                                 | 1 (0 – 1)          | 1 (0 – 1)          | 1 (0 – 1)          |
| <b>EDSS<sup>§</sup></b>                                                                    | 1.5 (1.0 – 2.0)    | 1.5 (1.0 – 2.0)    | 1.5 (1.0 – 2.0)    |
| <b>MRI T2LL<sup>§</sup> (&gt;9), n (%)</b>                                                 | 719 (83.4)         | 484 (83.7)         | 235 (82.7)         |
| <b>Pre-treatment<sup>¶</sup>, n (%)</b>                                                    | 434 (50.3)         | 299 (51.7)         | 135 (47.5)         |
| <b>DMT, n (%)</b>                                                                          |                    |                    |                    |
| Dimethyl fumarate                                                                          | 640 (74.2)         | 433 (74.9)         | 207 (72.9)         |
| Teriflunomide                                                                              | 222 (25.8)         | 145 (25.1)         | 77 (27.1)          |
| <b>Time to DMT discontinuation (or observation period in pwMS without discontinuation)</b> | 2.7 (1.8 – 4.0)    | 2.6 (1.7-4.1)      | 2.8 (2.0-4.0)      |
| <b>ARR on DMT<sup>‡</sup></b>                                                              | 0.11 (0.26)        | 0.12 (0.27)        | 0.10 (0.24)        |
| <b>EDSS progression, n (%)</b>                                                             | 65 (7.5)           | 44 (7.6)           | 21 (7.4)           |

Legend:

Data are shown as median (IQR) unless otherwise specified. Disease duration was the time between symptom onset and inclusion into registry, i.e. DMT start (baseline). ARR was calculated as the number of relapses divided by the observation period in years.

<sup>§</sup> These variables were assessed at baseline. <sup>†</sup> ARR was determined in the 12 months prior to baseline. <sup>¶</sup> Pre-treatment included interferon-beta and/ or glatiramer acetate. <sup>‡</sup> Mean (SD) is shown.

*Abbreviations:* ARR, annualized relapse rate; DMT, disease-modifying treatment; EDSS, Expanded Disability Status Scale; mDMT, moderate-efficacy DMT; MRI, magnetic resonance imaging; pwMS, people with multiple sclerosis; T2LL, T2 lesions load

**Table e-8:** Reasons for discontinuation of moderate-efficacy DMT depending on sex (Question 2).

|                     | <b>All</b> | <b>Female</b> | <b>Male</b> |
|---------------------|------------|---------------|-------------|
| Family planning     | 24 (33)    | 24 (100)      | 0 (0)       |
| Patient's request   | 19 (26)    | 15 (79)       | 4 (21)      |
| Disease stability   | 8 (11)     | 6 (75)        | 2 (25)      |
| Disease progression | 5 (7)      | 1 (20)        | 4 (80)      |
| Adverse events      | 17 (23)    | 15 (88)       | 2 (12)      |

Legend:

Data are shown as number (percentage).

*Abbreviations:* DMT, disease-modifying treatment

**Table e-9:** Demographics and clinical characteristics in pwMS depending in treatment de-escalation (*Question 3*).

| <b>DMT de-escalation</b>                                                           |                    |                      |                         |
|------------------------------------------------------------------------------------|--------------------|----------------------|-------------------------|
|                                                                                    | <b>All</b>         | <b>De-escalation</b> | <b>No de-escalation</b> |
| <b>Number</b>                                                                      | 1836               | 78                   | 1758                    |
| <b>Sex</b> (female), n (%)                                                         | 1268 (69.1)        | 48 (61.5)            | 1220 (69.4)             |
| <b>Age</b> (years)                                                                 | 35.8 (28.3 – 43.4) | 34.1 (29.5 – 44.7)   | 35.8 (28.2 – 43.4)      |
| <b>Disease duration</b> (years)                                                    | 6.8 (3.2 – 12.3)   | 7.5 (3.9 – 13.0)     | 6.8 (3.2 – 12.2)        |
| <b>Year of disease onset</b>                                                       | 2006 (2000-2010)   | 2003 (2000-2009)     | 2006 (2000-2010)        |
| <b>Pre-ARR<sup>†</sup></b>                                                         | 2 (1 – 2)          | 2 (1 – 2)            | 2 (1 – 2)               |
| <b>EDSS<sup>§</sup></b>                                                            | 2.5 (1.5 – 3.5)    | 2 (1.5 – 3)          | 2.5 (1.5 – 3.5)         |
| <b>MRI T2LL<sup>§</sup> (&gt;9), n (%)</b>                                         | 1696 (92.4)        | 73 (93.6)            | 1623 (92.3)             |
| <b>Pre-treatment<sup>¶</sup>, n (%)</b>                                            | 1573 (85.7)        | 70 (89.7)            | 1503 (85.5)             |
| <b>DMT, n (%)</b>                                                                  |                    |                      |                         |
| Fingolimod                                                                         | 829 (45.2)         | 29 (37.2)            | 800 (45.5)              |
| Natalizumab                                                                        | 1007 (54.8)        | 49 (62.8)            | 958 (54.5)              |
| <b>Time to de-escalation (or observation period in pwMS without de-escalation)</b> | 5.53 (3.24 – 7.89) | 4.26 (2.21 – 6.84)   | 5.59 (3.30 – 7.92)      |
| <b>ARR on DMT<sup>‡</sup></b>                                                      | 0.16 (0.29)        | 0.16 (0.26)          | 0.16 (0.29)             |
| <b>EDSS progression, n (%)</b>                                                     | 629 (34.3)         | 20 (25.6)            | 609 (34.6)              |

**Legend:**

Data are shown as median (IQR) unless otherwise specified. Disease duration was the time between symptom onset and inclusion into registry, i.e. DMT start (baseline). ARR was calculated as the number of relapses divided by the observation period in years.

<sup>§</sup> These variables were assessed at baseline. <sup>†</sup> ARR was determined in the 12 months prior to baseline. <sup>¶</sup> Pre-treatment included interferon-beta and/ or glatiramer acetate., <sup>‡</sup> Mean (SD) is shown.

**Abbreviations:** ARR, annualized relapse rate; DMT, disease-modifying treatment; EDSS, Expanded Disability Status Scale; MRI, magnetic resonance imaging; pwMS, people with multiple sclerosis; T2LL, T2 lesions load

**Table e-10:** Demographics and clinical characteristics depending on sex in pwMS de-escalating or continuing DMT (*Question 3*).

|                                                                                    | <b>All</b>         | <b>Female</b>      | <b>Male</b>        |
|------------------------------------------------------------------------------------|--------------------|--------------------|--------------------|
| <b>Number</b>                                                                      | 1836               | 1268               | 568                |
| <b>Age (years)</b>                                                                 | 35.8 (28.3 – 43.4) | 36.3 (28.4 – 43.7) | 34.4 (28.0 – 42.9) |
| <b>Disease duration (years)</b>                                                    | 6.8 (3.2 – 12.3)   | 7.2 (3.2 – 12.9)   | 6.1 (3.0 – 11.0)   |
| <b>Year of disease onset</b>                                                       | 2006 (2000-2010)   | 2005 (1999-2010)   | 2006 (2002-2010)   |
| <b>Pre-ARR<sup>†</sup></b>                                                         | 2 (1 – 2)          | 2 (1 – 2)          | 2 (1 – 2)          |
| <b>EDSS<sup>§</sup></b>                                                            | 2.5 (1.5 – 3.5)    | 2 (1.5 – 3.5)      | 2.5 (1.5 – 3.5)    |
| <b>MRI T2LL<sup>§</sup> (&gt;9), n (%)</b>                                         | 1696 (92.4)        | 1172 (92.4)        | 524 (92.3)         |
| <b>Pre-treatment<sup>¶</sup>, n (%)</b>                                            | 1573 (85.7)        | 1087 (85.7)        | 486 (85.6)         |
| <b>DMT, n (%)</b>                                                                  |                    |                    |                    |
| Fingolimod                                                                         | 829 (45.2)         | 564 (44.5)         | 265 (46.7)         |
| Natalizumab                                                                        | 1007 (54.8)        | 704 (55.5)         | 303 (53.3)         |
| <b>Time to de-escalation (or observation period in pwMS without de-escalation)</b> | 5.53 (3.24 – 7.89) | 5.58 (3.20-7.97)   | 5.51 (3.33-7.55)   |
| <b>ARR on DMT<sup>‡</sup></b>                                                      | 0.16 (0.29)        | 0.17 (0.31)        | 0.14 (0.24)        |
| <b>EDSS progression, n (%)</b>                                                     | 629 (34.3)         | 429 (33.8)         | 200 (35.2)         |

Legend:

Data are shown as median (IQR) unless otherwise specified. Disease duration was the time between symptom onset and inclusion into registry, i.e. DMT start (baseline). ARR was calculated as the number of relapses divided by the observation period in years.

<sup>§</sup> These variables were assessed at baseline. <sup>†</sup> ARR was determined in the 12 months prior to baseline. <sup>¶</sup> Pre-treatment included interferon-beta and/ or glatiramer acetate. <sup>‡</sup> Mean (SD) is shown.

*Abbreviations:* ARR, annualized relapse rate; DMT, disease-modifying treatment; EDSS, Expanded Disability Status Scale; MRI, magnetic resonance imaging; pwMS, people with multiple sclerosis; T2LL, T2 lesions load

**Table e-11:** Demographics and clinical characteristics in pwMS discontinuing high-efficacy DMT (*Question 4*).

| <b>hDMT discontinuation</b>                                                                |                    |                        |                           |
|--------------------------------------------------------------------------------------------|--------------------|------------------------|---------------------------|
|                                                                                            | <b>All</b>         | <b>Discontinuation</b> | <b>No Discontinuation</b> |
| <b>Number</b>                                                                              | 1941               | 231                    | 1710                      |
| <b>Sex (female), n (%)</b>                                                                 | 1370 (70.6)        | 186 (80.5)             | 1184 (69.2)               |
| <b>Age (years)</b>                                                                         | 35.7 (28.2 – 43.6) | 33.9 (28.0 – 43.8)     | 35.8 (28.2 – 43.5)        |
| <b>Disease duration (years)</b>                                                            | 6.8 (3.1 – 12.2)   | 6.6 (2.9 – 10.9)       | 6.8 (3.2 – 12.3)          |
| <b>Year of disease onset</b>                                                               | 2006 (2000-2010)   | 2005 (2000-2009)       | 2006 (2000-2010)          |
| <b>Pre-ARR<sup>†</sup></b>                                                                 | 2 (1 – 2)          | 2 (1 – 3)              | 2 (1 – 2)                 |
| <b>EDSS<sup>§</sup></b>                                                                    | 2.5 (1.5 – 3.5)    | 2.5 (1.5 – 4.0)        | 2.3 (1.5 – 3.5)           |
| <b>MRI T2LL<sup>§</sup> (&gt;9), n (%)</b>                                                 | 1796 (92.5)        | 217 (93.9)             | 1579 (92.3)               |
| <b>Pre-treatment<sup>¶</sup>, n (%)</b>                                                    | 1660 (85.5)        | 197 (85.3)             | 1463 (85.6)               |
| <b>DMT, n (%)</b>                                                                          |                    |                        |                           |
| Natalizumab                                                                                | 1074 (55.3)        | 158 (68.4)             | 916 (53.6)                |
| Fingolimod                                                                                 | 867 (44.7)         | 73 (31.6)              | 794 (46.4)                |
| <b>Time to DMT discontinuation (or observation period in pwMS without discontinuation)</b> | 5.36 (3.08 – 7.72) | 2.92 (1.95 – 5.09)     | 5.63 (3.32 – 7.92)        |
| <b>ARR on DMT<sup>‡</sup></b>                                                              | 0.18 (0.34)        | 0.33 (0.59)            | 0.16 (0.29)               |
| <b>EDSS progression, n (%)</b>                                                             | 318 (16.4)         | 71 (30.7)              | 247 (14.4)                |

Legend:

Data are shown as median (IQR) unless otherwise specified. Disease duration was the time between symptom onset and inclusion into registry, i.e. DMT start (baseline). ARR was calculated as the number of relapses divided by the observation period in years.

<sup>§</sup> These variables were assessed at baseline. <sup>†</sup> ARR was determined in the 12 months prior to baseline. <sup>¶</sup> Pre-treatment included interferon-beta and/ or glatiramer acetate., <sup>‡</sup> Mean (SD) is shown.

*Abbreviations:* ARR, annualized relapse rate; DMT, disease-modifying treatment, EDSS, Expanded Disability Status Scale; hDMT, high-efficacy DMT; MRI, magnetic resonance imaging; pwMS, people with multiple sclerosis; T2LL, T2 lesions load

**Table e-12:** Demographics and clinical characteristics depending on sex in pwMS stopping or continuing high-efficacy DMT (*Question 4*).

|                                                                                            | <b>All</b>         | <b>Female</b>      | <b>Male</b>        |
|--------------------------------------------------------------------------------------------|--------------------|--------------------|--------------------|
| <b>Number</b>                                                                              | 1941               | 1370               | 571                |
| <b>Age (years)</b>                                                                         | 35.7 (28.2 – 43.6) | 35.9 (28.3 – 43.5) | 34.7 (28.0 – 43.8) |
| <b>Disease duration (years)</b>                                                            | 6.8 (3.1 – 12.2)   | 7.1 (3.2 – 12.7)   | 6.2 (3.0 – 11.0)   |
| <b>Year of disease onset</b>                                                               | 2006 (2000-2010)   | 2005 (1999-2010)   | 2006 (2002-2010)   |
| <b>Pre-ARR<sup>†</sup></b>                                                                 | 2 (1 – 2)          | 2 (1 – 2)          | 2 (1 – 2)          |
| <b>EDSS<sup>§</sup></b>                                                                    | 2.5 (1.5 – 3.5)    | 2.0 (1.5 – 3.5)    | 2.5 (1.5 – 3.5)    |
| <b>MRI T2LL<sup>§</sup> (&gt;9), n (%)</b>                                                 | 1796 (92.5)        | 1268 (92.6)        | 528 (92.5)         |
| <b>Pre-treatment<sup>¶</sup>, n (%)</b>                                                    | 1660 (85.5)        | 1171 (85.5)        | 489 (85.6)         |
| <b>DMT, n (%)</b>                                                                          |                    |                    |                    |
| Natalizumab                                                                                | 1074 (55.3)        | 767 (56.0)         | 307 (53.8)         |
| Fingolimod                                                                                 | 867 (44.7)         | 603 (44.0)         | 264 (46.2)         |
| <b>Time to DMT discontinuation (or observation period in pwMS without discontinuation)</b> | 5.36 (3.08 – 7.72) | 5.28 (2.97-7.74)   | 5.46 (3.34-7.52)   |
| <b>ARR on DMT<sup>‡</sup></b>                                                              | 0.18 (0.34)        | 0.19 (0.37)        | 0.15 (0.26)        |
| <b>EDSS progression, n (%)</b>                                                             | 318 (16.4)         | 216 (15.8)         | 102 (17.9)         |

Legend:

Data are shown as median (IQR) unless otherwise specified. Disease duration was the time between symptom onset and inclusion into registry, i.e. DMT start (baseline). ARR was calculated as the number of relapses divided by the observation period in years.

<sup>§</sup> These variables were assessed at baseline. <sup>†</sup> ARR was determined in the 12 months prior to baseline. <sup>¶</sup> Pre-treatment included interferon-beta and/ or glatiramer acetate. <sup>‡</sup> Mean (SD) is shown.

*Abbreviations:* ARR, annualized relapse rate; DMT, disease-modifying treatment; EDSS, Expanded Disability Status Scale; MRI, magnetic resonance imaging; pwMS, people with multiple sclerosis; T2LL, T2 lesions load

**Table e-13:** Reasons for discontinuation of high-efficacy DMT depending on sex (*Question 4*).

|                         | <b>All</b> | <b>Female</b> | <b>Male</b> |
|-------------------------|------------|---------------|-------------|
| Family planning         | 74 (32)    | 74 (100)      | 0 (0)       |
| JCV positivity          | 32 (14)    | 25 (78)       | 7 (22)      |
| Patient's request       | 43 (19)    | 31 (72)       | 12 (28)     |
| Disease stability       | 3 (1)      | 2 (67)        | 1 (33)      |
| Disease progression     | 31 (13)    | 21 (68)       | 10 (32)     |
| Adverse events          | 31 (13)    | 23 (74)       | 8 (26)      |
| PML                     | 7 (3)      | 6 (86)        | 1 (14)      |
| Neutralizing antibodies | 1 (0.4)    | 1 (100)       | 0 (0)       |
| Other                   | 9 (4)      | 3 (33)        | 6 (67)      |

Legend:

Data are shown as number (percentage).

*Abbreviations:* DMT, disease-modifying treatment; JCV, John Cunningham virus; PML, progressive multifocal leukoencephalopathy

**Table e-14:** Cox regression analysis in a subgroup of pwMS excluding females with family planning for identifying predictors of early moderate-efficacy DMT discontinuation.

|                                                  | <b>Coefficient</b> | <b>SE</b> | <b>P value</b>   |
|--------------------------------------------------|--------------------|-----------|------------------|
| <b>Sex</b> (female, ref: male)                   | 0.736              | 0.421     | 0.081            |
| <b>Age</b> [years]                               | 0.098              | 0.030     | <b>&lt;0.001</b> |
| <b>Disease duration</b> [years]                  | -0.039             | 0.022     | 0.075            |
| <b>Pre-ARR</b> <sup>†</sup>                      | -0.176             | 0.213     | 0.410            |
| <b>EDSS</b> <sup>§</sup>                         | 0.059              | 0.111     | 0.595            |
| <b>MRI T2LL</b> <sup>§</sup> (>9, ref: ≤9)       | -0.184             | 0.404     | 0.649            |
| <b>Pre-treatment</b> <sup>¶</sup> (yes, ref: no) | 0.219              | 0.314     | 0.487            |
| <b>DMT</b> (DMF, ref: TER)                       | 0.734              | 0.350     | 0.036            |
| <b>ARR on DMT</b>                                | -1.674             | 1.019     | 0.100            |
| <b>EDSS progression</b> (yes, ref: no)           | 0.970              | 0.381     | 0.012            |
| <b>Sex : Age</b>                                 | -0.062             | 0.032     | 0.052            |

Legend:

<sup>§</sup> These variables were assessed at baseline. <sup>†</sup> ARR was determined in the 12 months prior to baseline. <sup>¶</sup> Pre-treatment included interferon-beta and/ or glatiramer acetate.

[ ] shows units and ( ) indicates reference categories.

Bold p-values hold with Bonferroni-Holm correction.

*Abbreviations:* ARR, annualized relapse rate; DMF, dimethyl fumarate; DMT, disease-modifying treatment; EDSS, Expanded Disability Status Scale; SE, standard error; T2LL, T2 lesions load; TER, teriflunomide



**Table e-15:** Cox regression analysis in the subgroup of pwMS excluding females with family planning for identifying predictors of early high-efficacy DMT discontinuation.

|                                                  | <b>Coefficient</b> | <b>SE</b> | <b>P value</b>   |
|--------------------------------------------------|--------------------|-----------|------------------|
| <b>Sex</b> (female, ref: male)                   | 0.040              | 0.181     | 0.825            |
| <b>Age</b> [years]                               | 0.028              | 0.009     | 0.003            |
| <b>Disease duration</b> [years]                  | -0.008             | 0.013     | 0.539            |
| <b>Pre-ARR</b> <sup>†</sup>                      | 0.010              | 0.071     | 0.885            |
| <b>EDSS</b> <sup>§</sup>                         | 0.226              | 0.055     | <b>&lt;0.001</b> |
| <b>MRI T2LL</b> <sup>§</sup> (>9, ref: ≤9)       | 0.220              | 0.391     | 0.573            |
| <b>Pre-treatment</b> <sup>¶</sup> (yes, ref: no) | -0.215             | 0.240     | 0.370            |
| <b>DMT</b> (NTZ, ref: FTY)                       | 0.204              | 0.200     | 0.309            |
| <b>ARR on DMT</b> <sup>#</sup>                   | 0.044              | 0.339     | 0.897            |
| <b>EDSS progression</b> (yes, ref: no)           | 0.717              | 0.173     | <b>&lt;0.001</b> |

Legend:

<sup>§</sup> These variables were assessed at baseline. <sup>†</sup> ARR was determined in the 12 months prior to baseline. <sup>¶</sup> Pre-treatment included interferon-beta and/ or glatiramer acetate.

<sup>#</sup> Additionally, interaction between the variable "ARR on DMT" and different "reasons for DMT stop" (adverse events and patient request) was considered due to confounding.

[ ] shows units and ( ) indicates reference categories.

Bold p-values hold with Bonferroni-Holm correction.

*Abbreviations:* ARR, annualized relapse rate; DMT, disease-modifying treatment; EDSS, Expanded Disability Status Scale; FTY, fingolimod; MRI, magnetic resonance imaging; NTZ, natalizumab; ref, reference; SE, standard error; T2LL, T2 lesions load

**Table e-16:** Sensitivity analysis in pwMS escalating or continuing DMT (*Question 1*) according to start of DMT.

|                                               | Whole cohort |        |        | After 2015  |
|-----------------------------------------------|--------------|--------|--------|-------------|
|                                               | Coefficient  | 95%-CI |        | Coefficient |
| <b>Age [years]</b>                            | -0.021       | -0.041 | -0.001 | -0.024      |
| <b>EDSS<sup>§</sup></b>                       | 0.144        | 0.003  | 0.286  | 0.139       |
| <b>ARR on DMT</b>                             | 2.117        | 1.779  | 2.455  | 2.013       |
| <b>Sex : ARR on DMT</b>                       | -0.708       | -1.073 | -0.344 | -0.636      |
| <b>EDSS progression (yes, ref: no)</b>        | 0.417        | 0.069  | 0.765  | 0.515       |
| <b>MRI activity during DMT (yes, ref: no)</b> | 3.166        | 2.546  | 3.786  | 3.286       |

Legend:

For this sensitivity analysis, the cohort of patients were used when inclusion into the AMSTR was after January, 1<sup>st</sup> 2015. For patients before 2015, separate analysis is not shown due to sample size limits.

Absolute numbers of events (DMT escalation from TER or DMF) was low before 2015, as both DMT have been approved not before 2013 and 2014, respectively. Note that the percentage of events (DMT escalation) was similar before/ after January, 1<sup>st</sup> 2015: 17/112 (15%) vs. 132/1099 (12%).

<sup>§</sup> This variable was assessed at baseline.

[ ] shows units and ( ) indicates reference categories.

*Abbreviations:* ARR, annualized relapse rate; CI, confidence interval; DMT, disease-modifying treatment; EDSS, Expanded Disability Status Scale; MRI, magnetic resonance imaging.

**Table e-17:** Sensitivity analysis in pwMS discontinuing moderate-efficacy DMT (*Question 2*) according to start of DMT.

|                                        | Whole cohort |        |        | After 2015  |
|----------------------------------------|--------------|--------|--------|-------------|
|                                        | Coefficient  | 95%-CI |        | Coefficient |
| <b>Sex</b> (female, ref: male)         | 1.214        | 0,421  | 2,007  | 1.303       |
| <b>Age</b> [years]                     | 0.087        | 0,032  | 0,142  | 0.057       |
| <b>ARR on DMT</b>                      | -1.674       | -3,287 | -0,060 | -1.312      |
| <b>EDSS progression</b> (yes, ref: no) | 0.773        | 0,131  | 1,416  | 0.833       |
| <b>Sex : Age</b>                       | -0.112       | -0,170 | -0,055 | -0.090      |

Legend:

For this sensitivity analysis, the cohort of patients were used when inclusion into the AMSTR was after January, 1<sup>st</sup> 2015. For patients before 2015, separate analysis is not shown due to sample size limits.

Absolute numbers of events (discontinuation of TER or DMF) was low before 2015, as both DMT have been approved not before 2013 and 2014, respectively. Note that the percentage of events (DMT discontinuation) was similar before/ after January, 1<sup>st</sup> 2015: 10/95 (11%) vs. 63/767 (8%).

[ ] shows units and () indicates reference categories.

*Abbreviations:* ARR, annualized relapse rate; CI, confidence interval; DMT, disease-modifying treatment; EDSS, Expanded Disability Status Scale.

**Table e-18:** Sensitivity analysis in pwMS de-escalating or continuing high-efficacy DMT (*Question 3*) according to start of DMT.

|                                        | Whole cohort |        |        | Before 2015 |
|----------------------------------------|--------------|--------|--------|-------------|
|                                        | Coefficient  | 95%-CI |        | Coefficient |
| <b>EDSS progression</b> (yes, ref: no) | -0.719       | -1.240 | -0.197 | -0.653      |

Legend:

For this sensitivity analysis, the cohort of patients were used when inclusion into the AMSTR was before January, 1<sup>st</sup> 2015. For patients after 2015, separate analysis is not shown due to sample size limits.

Note that the percentage of events (DMT de-escalation) was similar before/ after January, 1<sup>st</sup> 2015: 67/1318 (5%) vs. 11/518 (2%)

() indicates reference categories.

*Abbreviations:* CI, confidence interval; EDSS, Expanded Disability Status Scale.

**Table e-19:** Sensitivity analysis in pwMS discontinuing high-efficacy DMT (*Question 4*) according to start of DMT.

|                                        | Whole cohort |        |        | Before 2015 |
|----------------------------------------|--------------|--------|--------|-------------|
|                                        | Coefficient  | 95%-CI |        | Coefficient |
| <b>Sex</b> (female, ref: male)         | 0.542        | 0.211  | 0.873  | 0.648       |
| <b>EDSS<sup>§</sup></b>                | 0.163        | 0.070  | 0.255  | 0.185       |
| <b>ARR on DMT</b>                      | -0.958       | -1.697 | -0.217 | -0.549      |
| <b>EDSS progression</b> (yes, ref: no) | 0.634        | 0.337  | 0.932  | 0.686       |

Legend:

For this sensitivity analysis, the cohort of patients were used when inclusion into the AMSTR was before January, 1st 2015. For patients after 2015, separate analysis is not shown due to sample size limits.

Note that the percentage of events (DMT escalation) was lower after January, 1<sup>st</sup> 2015: 37/542 (7%) vs. 194/1399 (14%).

() indicates reference categories.

*Abbreviations:* ARR, annualized relapse rate; CI, confidence interval; DMT, disease-modifying treatment; EDSS, Expanded Disability Status Scale

**Table e-20:** A posteriori power analyses for the multivariable Cox regression identifying predictors of DMT escalation (*Question 1*).

|                                                 | <b>Coefficient</b> | <b>HR</b> | <b>Sig.</b> | <b>A posteriori power</b>                               | <b>Sample size for a power of 0.8</b> |
|-------------------------------------------------|--------------------|-----------|-------------|---------------------------------------------------------|---------------------------------------|
| <b>Sex</b> (female, ref: male)                  | 0.446              | 1.562     |             | 0.8                                                     | 1340                                  |
| <b>Age</b> [years]                              | -0.021             | 0.979     | *           |                                                         |                                       |
| <b>Disease duration</b> [years]                 | -0.025             | 0.975     |             | 0.6                                                     | 2162                                  |
| <b>Pre-ARR<sup>†</sup></b>                      | 0.004              | 1.004     |             | effect size of this co-variable not clinically relevant |                                       |
| <b>EDSS<sup>§</sup></b>                         | 0.144              | 1.155     | *           |                                                         |                                       |
| <b>MRI T2LL<sup>§</sup></b> (>9, ref: ≤9)       | -0.021             | 0.979     |             | effect size of this co-variable not clinically relevant |                                       |
| <b>Pre-treatment<sup>¶</sup></b> (yes, ref: no) | 0.017              | 1.017     |             | effect size of this co-variable not clinically relevant |                                       |
| <b>DMT</b> (DMF, ref: TER)                      | -0.043             | 0.958     |             | effect size of this co-variable not clinically relevant |                                       |
| <b>ARR on DMT</b>                               | 2.117              | 8.309     | ***         |                                                         |                                       |
| <b>Sex : ARR on DMT</b>                         | -0.708             | 0.493     | ***         |                                                         |                                       |
| <b>EDSS progression</b> (yes, ref: no)          | 0.417              | 1.517     |             |                                                         |                                       |
| <b>MRI activity during DMT</b> (yes, ref: no)   | 3.166              | 23.709    | ***         |                                                         |                                       |

Legend:

<sup>§</sup> These variables were assessed at baseline. <sup>†</sup> ARR was determined in the 12 months prior to baseline. <sup>¶</sup> Pre-treatment included interferon-beta and/ or glatiramer acetate.

\*, \*\*, \*\*\* shows statistical significance at a p value <0.05, <0.01 and <0.001.

[ ] shows units and ( ) indicates reference categories.

“:” denotes interaction effects between variables.

*Abbreviations:* ARR, annualized relapse rate; DMF, dimethyl fumarate; DMT, disease-modifying treatment; EDSS, Expanded Disability Status Scale; HR, hazard ratio; MRI, magnetic resonance imaging; Sig., Significance; T2LL, T2 lesions load; TER, teriflunomide

**Table e-21:** A posteriori power analyses for the multivariable Cox regression identifying predictors of moderate-efficacy DMT discontinuation (*Question 2*).

|                                                 | <b>Coefficient</b> | <b>HR</b> | <b>Sig.</b> | <b>A posteriori power</b>                               | <b>Sample size for a power of 0.8</b> |
|-------------------------------------------------|--------------------|-----------|-------------|---------------------------------------------------------|---------------------------------------|
| <b>Sex</b> (female, ref: male)                  | 1.214              | 3.366     | **          |                                                         |                                       |
| <b>Age</b> [years]                              | 0.087              | 1.091     | **          |                                                         |                                       |
| <b>Disease duration</b> [years]                 | -0.031             | 0.970     |             | 0.5                                                     | 2032                                  |
| <b>DMT</b> (DMF, ref: TER)                      | 0.617              | 1.853     |             | 0.7                                                     | 1115                                  |
| <b>Pre-ARR<sup>†</sup></b>                      | -0.027             | 0.973     |             | effect size of this co-variable not clinically relevant |                                       |
| <b>EDSS<sup>§</sup></b>                         | 0.132              | 1.141     |             | 0.4                                                     | 3179                                  |
| <b>MRI T2LL<sup>§</sup></b> (>9, ref: ≤9)       | -0.032             | 0.968     |             | effect size of this co-variable not clinically relevant |                                       |
| <b>Pre-treatment<sup>¶</sup></b> (yes, ref: no) | 0.337              | 1.400     |             | 0.4                                                     | 2959                                  |
| <b>ARR on DMT</b>                               | -1.674             | 0.188     | *           |                                                         |                                       |
| <b>EDSS progression</b> (yes, ref: no)          | 0.773              | 2.167     | *           |                                                         |                                       |
| <b>Sex : Age</b>                                | -0.112             | 0.894     | ***         |                                                         |                                       |

Legend:

<sup>§</sup> These variables were assessed at baseline. <sup>†</sup> ARR was determined in the 12 months prior to baseline. <sup>¶</sup> Pre-treatment included interferon-beta and/ or glatiramer acetate.

\*, \*\*, \*\*\* shows statistical significance at a p value <0.05, <0.01 and <0.001.

[ ] shows units and ( ) indicates reference categories.

“:” denotes interaction effects between variables.

*Abbreviations:* ARR, annualized relapse rate; DMF, dimethyl fumarate; DMT, disease-modifying treatment; EDSS, Expanded Disability Status Scale; HR, hazard ratio; MRI, magnetic resonance imaging; pwMS, people with multiple sclerosis; Sig., Significance; T2LL, T2 lesions load; TER, teriflunomide

**Table e-22:** A posteriori power analyses for the multivariable Cox regression identifying predictors of DMT de-escalation (*Question 3*).

|                                                 | <b>Coefficient</b> | <b>HR</b> | <b>Sig.</b> | <b>A posteriori power</b>                               | <b>Sample size for a power of 0.8</b> |
|-------------------------------------------------|--------------------|-----------|-------------|---------------------------------------------------------|---------------------------------------|
| <b>Sex</b> (female, ref: male)                  | -0.385             | 0.680     |             | 0.5                                                     | 4648                                  |
| <b>Age</b> [years]                              | 0.014              | 1.014     |             | effect size of this co-variable not clinically relevant |                                       |
| <b>Disease duration</b> [years]                 | 0.008              | 1.008     |             | effect size of this co-variable not clinically relevant |                                       |
| <b>Pre-ARR<sup>†</sup></b>                      | -0.060             | 0.942     |             | effect size of this co-variable not clinically relevant |                                       |
| <b>EDSS<sup>§</sup></b>                         | -0.069             | 0.933     |             | effect size of this co-variable not clinically relevant |                                       |
| <b>MRI T2LL<sup>§</sup></b> (>9, ref: ≤9)       | 0.076              | 1.079     |             | effect size of this co-variable not clinically relevant |                                       |
| <b>Pre-treatment<sup>¶</sup></b> (yes, ref: no) | 0.119              | 1.126     |             | effect size of this co-variable not clinically relevant |                                       |
| <b>DMT</b> (NTZ, ref: FTY)                      | -0.058             | 0.943     |             | effect size of this co-variable not clinically relevant |                                       |
| <b>ARR on DMT</b>                               | 0.292              | 1.339     |             | effect size of this co-variable not clinically relevant |                                       |
| <b>EDSS progression</b> (yes, ref: no)          | -0.719             | 0.487     | **          |                                                         |                                       |

Legend:

<sup>§</sup> These variables were assessed at baseline. <sup>†</sup> ARR was determined in the 12 months prior to baseline. <sup>¶</sup> Pre-treatment included interferon-beta and/ or glatiramer acetate.

\*, \*\*, \*\*\* shows statistical significance at a p value <0.05, <0.01 and <0.001.  
 [ ] shows units and ( ) indicates reference categories.

*Abbreviations:* ARR, annualized relapse rate; DMT, disease-modifying treatment; EDSS, Expanded Disability Status Scale; FTY, fingolimod; HR, hazard ratio; MRI, magnetic resonance imaging; NTZ, natalizumab; pwMS, people with multiple sclerosis; Sig., Significance; T2LL, T2 lesions load



**Table e-23:** A posteriori power analyses for the multivariable Cox regression identifying predictors of high-efficacy DMT discontinuation (*Question 4*).

|                                                 | <b>Coefficient</b> | <b>HR</b> | <b>Sig.</b> | <b>A posteriori power</b>                               | <b>Sample size for a power of 0.8</b> |
|-------------------------------------------------|--------------------|-----------|-------------|---------------------------------------------------------|---------------------------------------|
| <b>Sex</b> (female, ref: male)                  | 0.542              | 1.719     | **          |                                                         |                                       |
| <b>Age</b> [years]                              | 0.001              | 1.001     |             | effect size of this co-variable not clinically relevant |                                       |
| <b>Disease duration</b> [years]                 | -0.021             | 0.979     |             | 0.6                                                     | 3709                                  |
| <b>Pre-ARR<sup>†</sup></b>                      | -0.034             | 0.966     |             | effect size of this co-variable not clinically relevant |                                       |
| <b>EDSS<sup>§</sup></b>                         | 0.163              | 1.176     | ***         |                                                         |                                       |
| <b>MRI T2LL<sup>§</sup></b> (>9, ref: ≤9)       | 0.030              | 1.031     |             | effect size of this co-variable not clinically relevant |                                       |
| <b>Pre-treatment<sup>¶</sup></b> (yes, ref: no) | -0.235             | 0.791     |             | 0.3                                                     | 7807                                  |
| <b>DMT</b> (NTZ, ref: FTY)                      | -0.009             | 0.991     |             | effect size of this co-variable not clinically relevant |                                       |
| <b>ARR on DMT</b>                               | -0.957             | 0.384     | *           |                                                         |                                       |
| <b>EDSS progression</b> (yes, ref: no)          | 0.634              | 1.886     | ***         |                                                         |                                       |

**Legend:**

<sup>§</sup> These variables were assessed at baseline. <sup>†</sup> ARR was determined in the 12 months prior to baseline. <sup>¶</sup> Pre-treatment included interferon-beta and/ or glatiramer acetate.

\*, \*\*, \*\*\* shows statistical significance at a p value <0.05, <0.01 and <0.001.

[ ] shows units and ( ) indicates reference categories.

**Abbreviations:** ARR, annualized relapse rate; DMT, disease-modifying treatment; EDSS, Expanded Disability Status Scale; FTY, fingolimod; HR, hazard ratio; MRI, magnetic resonance imaging; NTZ, natalizumab; pwMS, people with multiple sclerosis; Sig., Significance; T2LL, T2 lesions load
